# Supplementary material for: RNA-Seq Profiling Shows Divergent Gene Expression Patterns in Arabidopsis Grown under Different Densities
Source: Front Plant Sci. 2017 Nov 28;8:2001. doi: 10.3389/fpls.2017.02001 (PMC5712407; doi:10.3389/fpls.2017.02001)
Supplement: TABLE S7 — GO enrichment analysis of differentially expressed genes. [file Table_7.XLS]

## Sheet: GO Enrichment Analysis
Differential Expressed Gene: GO Annotation				#		Differential Expressed Gene: GO Enrichment Analysis															#
				#
CH 2-Fold up vs. CL		CL 2-Fold up vs. CH		#		GOSlim	Description	GO	CH Up		CL Up		DE gene		Genome		Significant		Genes
ID	GO	ID	GO	#					Count	Percent	Count	Percent	Count	Percent	Count	Percent	P-value	-LOG10(P-value)	CH	CL
AT2G21650	GO:0003677;GO:0003682;GO:0003700;GO:0005634;GO:0005737;GO:0006351;GO:0009630;GO:0009793;GO:0010114;	AT2G30770	GO:0005506;GO:0006952;GO:0016021;GO:0016705;GO:0020037;GO:0047720;GO:0055114;	#		Biological Process	biological_process	GO:0008150	21	0.0319635	30	0.0432277	51	0.0377498	7479	0.0517947	0.802456	0.0955788	AT5G17330;AT4G26150;AT5G57625;AT5G44380;AT2G01520;AT4G12470;AT1G27020;AT2G42870;AT5G44610;AT1G55170;AT3G16450;AT4G32650;AT3G28740;AT3G26770;AT1G19610;AT5G63600;AT2G05510;AT5G27220;AT2G35290;AT4G33720;AT3G01420	AT5G13890;AT5G40460;AT4G00700;AT1G76960;AT4G38560;AT5G03350;AT2G44380;AT3G15518;AT1G45145;AT4G05430;AT1G17030;AT1G28480;AT2G29350;AT3G09940;AT3G21550;AT3G14170;AT5G53330;AT1G13650;AT4G23700;AT4G24265;AT5G52390;AT5G13320;AT2G03505;AT3G15050;AT5G54970;AT1G09450;AT4G34380;AT1G80820;AT5G64530;AT5G57010	#
AT2G15090	GO:0003824;GO:0005783;GO:0006633;GO:0008152;GO:0008610;GO:0016020;GO:0016021;GO:0016747;	AT4G15660	GO:0005634;GO:0005737;GO:0009055;GO:0015035;GO:0045454;GO:0046872;GO:0051537;	#			abscission	GO:0009838	0	0	0	0	0	0	35	0.000242387	1	0	-	-	#
AT1G73330	GO:0004866;GO:0004866;GO:0006508;GO:0008233;GO:0008233;GO:0009414;GO:0009414;GO:0010466;GO:0010466;GO:0010951;GO:0030414;GO:0030414;	AT2G24850	GO:0003824;GO:0004838;GO:0006520;GO:0008483;GO:0009058;GO:0009611;GO:0009753;GO:0030170;	#			anatomical structure morphogenesis	GO:0009653	5	0.00761035	4	0.00576369	9	0.00666173	1124	0.0077841	0.465095	0.332458	AT1G12040;AT5G44610;AT3G24300;AT2G18480;AT1G75240	AT1G09450;AT4G28250;AT1G09080;AT5G63540	#
AT2G01530	GO:0005507;GO:0006952;GO:0006952;GO:0009607;GO:0009607;GO:0009735;	AT4G15670	GO:0005634;GO:0005737;GO:0009055;GO:0015035;GO:0045454;GO:0046872;GO:0051537;	#			behavior	GO:0007610	0	0	0	0	0	0	2	1.38507e-05	1	0	-	-	#
AT4G30170	GO:0004601;GO:0005576;GO:0006979;GO:0020037;GO:0042744;GO:0046872;GO:0055114;	AT3G44990	GO:0004553;GO:0005618;GO:0005975;GO:0006073;GO:0016762;GO:0016998;GO:0033946;GO:0048046;GO:0071555;	#			cellular component organization	GO:0016043	12	0.0182648	12	0.0172911	24	0.0177646	3042	0.0210669	0.422335	0.374343	AT4G25820;AT4G12470;AT2G36100;AT3G54590;AT1G12040;AT4G34970;AT1G23720;AT3G54580;AT3G09260;AT5G44610;AT3G28550;AT5G04960	AT4G28250;AT3G53650;AT4G13890;AT5G56320;AT1G09080;AT2G20750;AT4G03330;AT1G21310;AT1G09450;AT1G08050;AT5G63540;AT3G44990	#
AT4G26150	GO:0003700;GO:0005634;GO:0006351;GO:0006355;GO:0007623;GO:0008270;GO:0009416;GO:0009735;GO:0009740;GO:0009910;GO:0010187;GO:0010380;GO:0010468;GO:0043565;GO:0044212;	AT1G76960	GO:0008150;	#			cellular process	GO:0009987	74	0.112633	75	0.108069	149	0.110289	14324	0.0991987	1.52639e-09	8.81633	AT2G36400;AT5G21960;AT2G39310;AT5G63560;AT1G75240;AT1G52000;AT4G06746;AT1G23720;AT5G09220;AT5G07010;ATCG00360;AT1G52070;AT4G30170;AT4G34410;AT2G44750;AT5G43350;AT2G15090;AT5G17330;AT3G15620;AT3G54590;AT4G12470;AT5G15640;AT3G05690;AT1G25425;AT4G36770;ATMG00560;AT1G74930;AT3G26770;AT4G34970;AT5G63600;AT1G52890;AT4G25470;AT3G28550;AT5G56840;AT3G09220;AT5G04960;AT5G44610;AT4G34250;AT3G16450;AT4G26150…	AT4G18960;AT2G24490;AT4G13890;AT3G15050;AT4G03330;AT1G16420;AT3G60540;AT4G11890;AT5G40460;AT4G08250;AT1G06830;AT4G38560;AT2G20750;AT1G09080;AT1G21310;AT3G10600;AT4G23700;AT3G13100;AT3G10340;AT1G70920;AT5G56320;AT2G24850;AT1G25530;AT1G02190;AT5G04770;AT4G15670;AT5G22570;AT4G23140;AT4G23150;AT4G28250;AT3G58350;AT3G26830;AT5G18270;AT4G21850;AT1G19250;AT5G53330;AT5G63540;AT5G13320;AT5G48850;AT4G04500…	#
AT4G34250	GO:0003824;GO:0003824;GO:0006633;GO:0006633;GO:0008152;GO:0008152;GO:0008610;GO:0008610;GO:0009416;GO:0016020;GO:0016020;GO:0016021;GO:0016740;GO:0016746;GO:0016747;GO:0016747;	AT5G22570	GO:0003700;GO:0003700;GO:0005634;GO:0006351;GO:0006355;GO:0006355;GO:0009863;GO:0042742;GO:0043565;GO:0043565;	#			death	GO:0016265	2	0.00304414	5	0.00720461	7	0.00518135	310	0.00214686	0.00901769	2.0449	AT3G01420;AT4G12470	AT1G19250;AT1G08050;AT1G16420;AT5G64530;AT5G13320	#
AT4G06746	GO:0003677;GO:0003700;GO:0005634;GO:0006351;GO:0006355;GO:0009873;	AT4G33790	GO:0005783;GO:0006629;GO:0010025;GO:0010345;GO:0035336;GO:0080019;	#			embryo development	GO:0009790	1	0.00152207	0	0	1	0.000740192	372	0.00257623	0.939866	0.0269342	AT2G21650	-	#
AT5G56840	GO:0003676;GO:0003676;GO:0003677;GO:0003677;GO:0003682;GO:0003682;GO:0003700;GO:0003700;GO:0006355;GO:0006355;GO:0008270;GO:0008270;	AT1G56120	GO:0001653;GO:0004672;GO:0004672;GO:0004674;GO:0004675;GO:0005515;GO:0005524;GO:0005524;GO:0005886;GO:0006468;GO:0006468;GO:0007178;GO:0009506;GO:0009755;GO:0016021;GO:0016021;GO:0016301;GO:0016310;GO:0016772;GO:0016772;GO:0031625;GO:0046777;	#			fruit ripening	GO:0009835	0	0	0	0	0	0	10	6.92535e-05	1	0	-	-	#
AT3G15620	GO:0003913;GO:0006281;GO:0000166;GO:0003677;GO:0003913;GO:0003914;GO:0006281;GO:0009411;	AT3G14940	GO:0003824;GO:0005829;GO:0006099;GO:0008964;GO:0015977;GO:0015979;	#			growth	GO:0040007	3	0.00456621	2	0.00288184	5	0.00370096	615	0.00425909	0.488185	0.311415	AT2G42870;AT1G12040;AT5G44610	AT1G09080;AT3G46090	#
AT2G16650	GO:0001682;GO:0004526;GO:0005634;GO:0006397;GO:0043144;GO:0090501;GO:0090502;	AT2G20750	GO:0005576;GO:0005618;GO:0016020;GO:0019953;GO:0071555;	#			metabolic process	GO:0008152	61	0.0928463	72	0.103746	133	0.0984456	14870	0.10298	0.00124347	2.90537	AT5G04960;AT3G09220;AT5G56840;AT4G34250;AT3G16450;AT4G26150;ATCG00540;AT3G04570;AT1G73330;AT3G09260;AT2G16650;AT4G36770;AT3G05690;AT3G01420;AT4G35900;AT2G22890;AT1G74930;ATMG00560;AT5G23020;AT2G15480;AT3G26770;AT3G28740;AT5G63600;AT4G25470;AT2G39705;AT1G52890;AT5G58860;AT4G30170;AT2G42870;AT1G52070;AT5G64100;AT3G18010;AT4G15390;AT4G34410;AT1G16400;AT2G44750;AT2G15090;AT5G44380;AT5G17330;AT2G21650…	AT5G19880;AT5G38710;AT1G80820;AT5G64530;AT1G09450;AT3G49340;AT3G14940;AT4G15680;AT1G02450;AT4G33790;AT4G04510;AT5G67450;AT1G13650;AT3G25040;AT2G30770;AT4G21840;AT2G46580;AT1G45145;AT5G03350;AT5G59540;AT4G00700;AT5G64810;AT3G44990;AT4G15700;AT1G21240;AT1G53520;AT1G56120;AT2G01610;AT5G13320;AT4G04500;AT5G48850;AT1G01680;AT4G15690;AT1G08050;AT4G18250;AT3G09940;AT1G28480;AT4G15660;AT2G04450;AT2G30750…	#
AT3G30775	GO:0004657;GO:0005739;GO:0006562;GO:0006979;GO:0009414;GO:0010133;GO:0042742;	AT3G26830	GO:0004497;GO:0005506;GO:0005506;GO:0005783;GO:0006952;GO:0009055;GO:0009414;GO:0009617;GO:0009625;GO:0009700;GO:0009737;GO:0010112;GO:0010120;GO:0010298;GO:0016020;GO:0016021;GO:0016628;GO:0016705;GO:0016705;GO:0016709;GO:0020037;GO:0020037;GO:0043231;GO:0055114;GO:0055114;	#			multicellular organismal development	GO:0007275	17	0.0258752	5	0.00720461	22	0.0162842	2687	0.0186084	0.359583	0.444201	AT3G18010;AT4G34410;AT1G55170;AT5G44610;AT2G01520;AT4G26150;AT2G21650;AT1G75240;AT4G35900;AT1G25425;AT2G18480;AT2G36400;AT3G24300;AT1G52410;AT2G39705;AT1G74930;AT1G12040	AT1G09450;AT4G18960;AT5G64530;AT5G63540;AT4G13890	#
AT4G32480	-	AT3G09940	GO:0016491;GO:0016491;GO:0050660;GO:0050660;GO:0055114;GO:0055114;GO:0005829;GO:0009414;GO:0009610;GO:0009651;GO:0009753;GO:0016491;GO:0016656;GO:0043903;GO:0050660;GO:0055114;	#			pollination	GO:0009856	0	0	1	0.00144092	1	0.000740192	286	0.00198065	0.884426	0.0533384	-	AT1G09080	#
AT5G05600	GO:0005506;GO:0005506;GO:0009611;GO:0009620;GO:0009695;GO:0009753;GO:0009867;GO:0016491;GO:0016491;GO:0016706;GO:0016706;GO:0051213;GO:0055114;GO:0055114;GO:0080167;GO:0080167;	AT1G28480	GO:0005634;GO:0005737;GO:0009055;GO:0009751;GO:0009863;GO:0009867;GO:0015035;GO:0045454;	#			post-embryonic development	GO:0009791	10	0.0152207	3	0.00432277	13	0.0096225	1540	0.010665	0.366891	0.435463	AT4G35900;AT1G75240;AT2G18480;AT1G55170;AT3G24300;AT2G36400;AT1G52410;AT2G21650;AT4G26150;AT2G01520	AT5G63540;AT4G18960;AT1G09450	#
AT2G18196	GO:0030001;GO:0030001;GO:0046872;GO:0046872;	AT5G52390	GO:0008150;	#			regulation of gene expression, epigenetic	GO:0040029	0	0	1	0.00144092	1	0.000740192	256	0.00177289	0.854914	0.0680776	-	AT1G09450	#
AT4G36770	GO:0008152;GO:0009813;GO:0016758;GO:0043231;GO:0052696;GO:0080043;GO:0080044;	AT1G06830	GO:0005737;GO:0009055;GO:0015035;GO:0045454;GO:0046872;GO:0051537;	#			reproduction	GO:0000003	6	0.00913242	6	0.00864553	12	0.00888231	1752	0.0121332	0.664694	0.177378	AT2G01520;AT1G55170;AT2G21650;AT4G26150;AT3G05690;AT4G35900	AT1G09080;AT5G63540;AT2G20750;AT4G18960;AT4G28250;AT1G09450	#
AT5G07010	GO:0005737;GO:0008146;GO:0009694;GO:0009753;GO:0080131;	AT3G10340	GO:0003824;GO:0005737;GO:0006559;GO:0009058;GO:0009800;GO:0016841;GO:0045548;	#			response to abiotic stimulus	GO:0009628	18	0.0273973	11	0.0158501	29	0.0214656	2040	0.0141277	0.000634626	3.19748	AT4G12470;AT3G15620;AT3G30775;AT4G26150;AT2G21650;AT3G16450;AT4G34250;AT2G42870;AT5G44610;AT4G11650;AT1G52890;AT4G25470;AT1G52410;AT5G63600;AT4G35900;AT5G05600;AT3G09260;AT1G73330	AT3G48850;AT3G26830;AT3G09940;AT5G59720;AT1G16420;AT1G80820;AT5G67450;AT4G11890;AT1G19250;AT5G38710;AT1G08050	#
AT4G25470	GO:0003677;GO:0003677;GO:0003700;GO:0003700;GO:0005634;GO:0005634;GO:0006351;GO:0006351;GO:0006355;GO:0006355;GO:0009409;GO:0009631;	AT4G28250	GO:0005576;GO:0005576;GO:0005618;GO:0006949;GO:0009506;GO:0016020;GO:0019953;GO:0019953;GO:0071555;GO:0005576;GO:0005576;GO:0019953;GO:0019953;	#			response to biotic stimulus	GO:0009607	19	0.0289193	19	0.0273775	38	0.0281273	1375	0.00952236	2.52349e-12	11.598	AT2G36400;AT3G09260;AT5G05600;AT3G01420;AT1G19610;AT1G74930;AT2G15480;AT4G32650;AT3G28740;AT1G52410;AT4G11650;AT1G16400;AT1G70850;AT4G34410;AT2G01530;AT2G01520;AT3G30775;AT3G04570;AT4G12470	AT1G19250;AT1G08050;AT3G13100;AT3G09940;AT2G29350;AT2G04450;AT1G45145;AT4G38560;AT3G58350;AT5G03350;AT3G26830;AT4G00700;AT5G64810;AT5G22570;AT4G11890;AT3G60540;AT5G04770;AT1G02450;AT5G13320	#
AT1G28330	-	AT5G03350	GO:0005618;GO:0005618;GO:0008150;GO:0009507;GO:0009507;GO:0009627;GO:0016301;GO:0016301;GO:0016310;GO:0030246;GO:0030246;GO:0048046;GO:0048046;GO:0071446;	#			response to endogenous stimulus	GO:0009719	15	0.0228311	16	0.0230548	31	0.022946	2240	0.0155128	0.000636852	3.19596	AT1G75240;AT4G34410;AT5G05600;AT3G16360;AT3G01420;AT2G35290;AT5G44610;AT2G42870;AT3G09260;AT5G21960;AT5G07010;AT1G74930;AT4G06746;AT2G01530;AT4G26150	AT5G40460;AT3G26830;AT3G46090;AT3G09940;AT4G18250;AT1G28480;AT4G04510;AT5G67450;AT1G08050;AT4G04500;AT2G24850;AT1G56120;AT4G11890;AT5G64810;AT4G23150;AT1G21240	#
AT5G17330	GO:0003824;GO:0004351;GO:0005516;GO:0005829;GO:0006536;GO:0016831;GO:0019752;GO:0030170;GO:0046686;	AT4G23150	GO:0000302;GO:0001653;GO:0004672;GO:0004675;GO:0005524;GO:0005886;GO:0006468;GO:0007178;GO:0009506;GO:0009755;GO:0016021;GO:0016772;GO:0031625;GO:0046777;	#			response to external stimulus	GO:0009605	20	0.0304414	20	0.0288184	40	0.0296077	1772	0.0122717	2.92122e-10	9.53444	AT5G43350;AT1G16400;AT4G34410;AT4G11650;AT5G44610;AT4G12470;AT3G30775;AT3G04570;AT2G21650;AT3G01420;AT5G05600;AT3G09260;AT2G36400;AT1G52410;AT5G63600;AT3G28740;AT4G32650;AT2G15480;AT1G19610;AT1G74930	AT3G09940;AT2G29350;AT3G13100;AT1G08050;AT1G19250;AT4G00700;AT3G26830;AT3G58350;AT4G38560;AT5G03350;AT1G45145;AT2G04450;AT5G04770;AT3G60540;AT5G22570;AT5G64810;AT4G11890;AT5G48850;AT5G13320;AT1G02450	#
AT2G35290	GO:0008150;GO:0009741;	AT4G15690	GO:0005634;GO:0005737;GO:0009055;GO:0015035;GO:0045454;GO:0046872;GO:0051537;	#			response to stress	GO:0006950	33	0.0502283	35	0.0504323	68	0.0503331	3708	0.0256792	4.58049e-13	12.3391	AT5G05600;AT1G52040;AT5G17820;AT4G34410;AT1G70850;AT1G16400;AT5G43350;AT4G30170;AT5G64100;AT3G15620;AT3G30775;AT1G30870;AT4G12470;AT1G63350;AT2G01530;AT5G44380;AT3G01420;AT1G73330;AT3G09260;AT5G63600;AT4G25470;AT1G52410;AT1G52890;AT1G74930;AT1G19610;AT2G15480;AT3G28740;AT3G16450;AT5G44610;AT4G11650;AT3G04570;AT1G64360;AT2G01520	AT5G63540;AT2G30770;AT3G25040;AT4G21840;AT1G19250;AT5G67450;AT4G21850;AT2G29350;AT3G26830;AT3G58350;AT5G03350;AT1G45145;AT4G00700;AT4G23140;AT4G23150;AT5G38710;AT5G19880;AT5G22570;AT1G80820;AT2G24850;AT3G48850;AT1G02450;AT1G08050;AT1G01680;AT3G09940;AT4G38560;AT3G46090;AT4G11890;AT5G64810;AT5G59720;AT1G16420;AT3G60540;AT5G13320;AT5G48850;AT2G24490	#
AT2G39705	GO:0009062;GO:0016925;GO:0048367;GO:0048367;	AT2G29350	GO:0008152;GO:0008152;GO:0016491;GO:0016491;GO:0055114;GO:0002213;GO:0002213;GO:0004022;GO:0004022;GO:0007568;GO:0007568;GO:0008152;GO:0008152;GO:0016491;GO:0016491;GO:0055114;GO:0008152;GO:0008152;GO:0016491;GO:0016491;GO:0055114;	#			sequence-specific DNA binding transcription factor activity	GO:0003700	13	0.0197869	9	0.0129683	22	0.0162842	1532	0.0106096	0.00261012	2.58334	AT5G56840;AT5G21960;AT3G18010;AT1G75240;AT4G34410;AT3G05690;AT4G35900;AT1G74930;AT4G06746;AT4G26150;AT2G21650;AT4G25470;AT1G52890	AT5G64810;AT5G67450;AT5G22570;AT5G64530;AT5G18270;AT3G46090;AT4G08250;AT1G70920;AT4G18960	#
AT1G19610	GO:0005576;GO:0006952;GO:0031640;GO:0050832;	AT2G04450	GO:0000210;GO:0016787;GO:0035529;GO:0046872;GO:0047631;GO:0051287;GO:0051707;GO:0080151;	#			translation regulator activity	GO:0045182	0	0	0	0	0	0	2	1.38507e-05	1	0	-	-	#
AT5G23020	GO:0003824;GO:0003824;GO:0003852;GO:0009098;GO:0009507;GO:0010177;GO:0019752;GO:0019752;GO:0019761;GO:0046912;GO:0046912;	AT1G02450	GO:0005634;GO:0010112;GO:0042742;GO:0045892;	#			transport	GO:0006810	14	0.021309	14	0.0201729	28	0.0207254	3120	0.0216071	0.177295	0.751304	AT5G44380;AT4G32650;AT4G12470;AT5G63600;AT3G04570;AT5G09220;AT5G44610;AT5G15640;AT2G18480;AT3G24300;AT5G43350;AT2G18196;AT5G59520;AT4G15390	AT4G28700;AT3G48850;AT4G35060;AT3G58350;AT2G44380;AT4G03330;AT3G60540;AT1G25530;AT5G04770;AT3G10600;AT4G23700;AT1G08050;AT3G25040;AT3G13100	#
AT5G09220	GO:0003333;GO:0005886;GO:0005887;GO:0015293;GO:0015800;GO:0015804;	AT4G15680	GO:0005634;GO:0005737;GO:0009055;GO:0015035;GO:0045454;GO:0046872;GO:0051537;	#		Cellular Component	cellular_component	GO:0005575	7	0.0106545	13	0.018732	20	0.0148038	2580	0.0178674	0.46729	0.330413	AT5G17820;AT3G16450;AT4G12470;AT5G44380;AT3G09260;AT1G12040;AT5G64100	AT4G18250;AT4G11890;AT4G04510;AT1G21240;AT4G23150;AT5G40460;AT4G28700;AT4G00700;AT4G28250;AT4G04500;AT1G45145;AT4G35060;AT1G56120	#
AT1G64360	GO:0006979;GO:0006979;	AT4G11890	GO:0000166;GO:0004672;GO:0004672;GO:0004674;GO:0004674;GO:0005524;GO:0005524;GO:0006468;GO:0006468;GO:0016301;GO:0016310;GO:0016772;GO:0016772;GO:0004672;GO:0004672;GO:0004674;GO:0005524;GO:0005524;GO:0006468;GO:0006468;GO:0016301;GO:0016310;GO:0016772;GO:0016772;GO:0000165;GO:0000166;GO:0001653;GO:0002237;GO:0004672;GO:0004672;GO:0004674;GO:0004675;GO:0005524;GO:0005524;GO:0005886;GO:0006468;GO:…	#			cell	GO:0005623	58	0.0882801	66	0.0951009	124	0.0917839	13648	0.0945172	0.00127906	2.89311	AT5G58860;AT2G42870;AT5G64100;AT3G18010;AT1G16400;AT4G34410;AT2G44750;AT5G43350;AT2G15090;AT5G44380;AT2G21650;AT5G17330;AT3G54590;AT4G11320;AT3G30775;AT2G36100;AT4G12470;AT5G27220;AT2G36400;AT2G28120;AT1G52040;AT5G21960;AT1G75240;AT4G06746;ATCG00360;AT5G07010;AT5G09220;AT5G17820;AT4G25820;AT5G04960;AT5G44610;AT3G16360;AT3G16450;AT2G01520;AT4G26150;ATCG00540;AT3G04570;AT2G18480;AT3G24300;AT3G09260…	AT4G28700;AT1G02450;AT4G33790;AT3G49340;AT3G14940;AT4G15680;AT5G64530;AT1G35230;AT1G09450;AT5G38710;AT4G00700;AT1G45145;AT5G03350;AT5G67450;AT4G04510;AT4G21840;AT3G25040;AT5G48850;AT4G04500;AT1G56120;AT5G59720;AT1G53520;AT5G64810;AT4G15700;AT3G44990;AT3G53650;AT2G35450;AT4G15660;AT3G46090;AT3G09940;AT4G18250;AT3G21550;AT1G28480;AT4G15690;AT1G08050;AT1G70920;AT3G48850;AT5G56320;AT5G04770;AT1G25530…	#
AT2G15480	GO:0008152;GO:0008152;GO:0016740;GO:0016757;GO:0016758;GO:0016758;GO:0006952;GO:0008152;GO:0009813;GO:0016758;GO:0035251;GO:0043231;GO:0047893;GO:0051707;GO:0052696;GO:0080043;GO:0080044;	AT5G38710	GO:0004657;GO:0005739;GO:0006562;GO:0006970;GO:0009414;GO:0010133;	#			cytoplasm	GO:0005737	25	0.0380518	36	0.0518732	61	0.0451517	8498	0.0588516	0.674945	0.170731	AT5G58860;AT5G44610;AT1G16400;AT3G18010;AT2G44750;AT3G16360;AT2G01520;AT2G15090;AT5G17330;AT2G21650;AT4G11320;AT3G30775;ATCG00540;AT4G12470;AT5G27220;AT1G52040;AT3G09260;AT5G15640;AT2G22890;AT5G23020;ATMG00560;AT4G32650;ATCG00360;AT5G07010;AT1G52410	AT4G13890;AT4G15700;AT4G11890;AT1G53520;AT3G60540;AT5G59720;AT4G03330;AT1G09080;AT4G15660;AT2G35450;AT1G06830;AT3G10340;AT3G13100;AT4G15690;AT4G23700;AT3G10600;AT1G28480;AT3G09940;AT3G21550;AT3G14940;AT4G15680;AT3G49340;AT3G48850;AT4G33790;AT5G38710;AT4G15670;AT5G04770;AT1G09450;AT5G03350;AT3G26830;AT4G13200;AT1G45145;AT4G21840;AT3G25040;AT4G21850;AT5G18270	#
AT3G54590	GO:0005199;GO:0005576;GO:0009530;GO:0009664;	AT3G15518	GO:0003674;GO:0008150;	#			cytoskeleton	GO:0005856	2	0.00304414	0	0	2	0.00148038	369	0.00255545	0.765103	0.11628	AT4G34970;AT5G44610	-	#
AT2G36100	GO:0003954;GO:0005886;GO:0007043;GO:0016021;GO:0042545;GO:0042803;GO:0048226;GO:0051536;GO:0055114;	AT4G21850	GO:0006979;GO:0016671;GO:0030091;GO:0033743;GO:0055114;GO:0005829;GO:0006979;GO:0016671;GO:0030091;GO:0033743;GO:0046872;GO:0055114;	#			cytosol	GO:0005829	6	0.00913242	6	0.00864553	12	0.00888231	1796	0.0124379	0.697588	0.156401	AT3G16360;AT2G44750;AT3G18010;AT5G17330;AT5G27220;AT2G01520	AT3G09940;AT4G21850;AT1G45145;AT4G11890;AT4G21840;AT3G14940	#
AT4G34970	GO:0003779;GO:0005622;GO:0015629;GO:0030041;GO:0030042;	AT1G25530	GO:0003333;GO:0005886;GO:0015171;GO:0016020;GO:0016021;GO:0016021;	#			endoplasmic reticulum	GO:0005783	6	0.00913242	6	0.00864553	12	0.00888231	829	0.00574112	0.0225858	1.64616	AT3G09260;AT4G32650;AT2G15090;AT1G52410;AT4G12470;AT1G16400	AT1G09080;AT3G26830;AT3G25040;AT3G60540;AT3G21550;AT4G33790	#
AT1G52000	GO:0019762;GO:0030246;GO:0080028;	AT4G23140	GO:0000302;GO:0004672;GO:0004674;GO:0005524;GO:0005886;GO:0006468;GO:0016021;GO:0016772;GO:0004672;GO:0005524;GO:0006468;GO:0016772;	#			endosome	GO:0005768	0	0	1	0.00144092	1	0.000740192	387	0.00268011	0.946354	0.0239466	-	AT4G23700	#
AT1G75240	GO:0003677;GO:0003677;GO:0003700;GO:0003700;GO:0005634;GO:0005634;GO:0006351;GO:0009737;GO:0009737;GO:0009738;GO:0010103;GO:0042803;GO:0045893;GO:0045893;GO:0046872;	AT5G04770	GO:0003333;GO:0005886;GO:0005887;GO:0009624;GO:0015171;GO:0015179;GO:0015297;GO:0015807;GO:0016020;GO:0031969;GO:1902475;	#			external encapsulating structure	GO:0030312	9	0.0136986	6	0.00864553	15	0.0111029	751	0.00520094	0.000562838	3.24962	AT5G04960;AT5G64100;AT5G44380;AT1G12040;AT3G54590;AT5G17820;AT2G36100;AT4G25820;AT4G12470	AT4G28250;AT1G21310;AT5G56320;AT3G44990;AT2G20750;AT5G03350	#
AT3G05690	GO:0003677;GO:0003700;GO:0003700;GO:0006351;GO:0006355;GO:0006355;GO:0009567;GO:0016602;	AT3G13100	GO:0005524;GO:0005774;GO:0006810;GO:0008559;GO:0016021;GO:0016887;GO:0042626;GO:0051707;GO:0055085;	#			extracellular region	GO:0005576	16	0.0243531	10	0.0144092	26	0.019245	1537	0.0106443	8.72897e-05	4.05904	AT1G19610;AT2G23540;AT1G12040;AT5G17820;AT2G30210;AT4G25820;AT1G25425;AT4G33720;AT5G57625;AT3G54590;AT4G11320;AT4G12470;AT1G30870;AT3G09220;AT4G30170;AT5G64100	AT5G03350;AT2G20750;AT5G56320;AT3G13650;AT3G49340;AT1G45145;AT4G28250;AT3G44990;AT5G19880;AT1G21310	#
AT1G74930	GO:0001944;GO:0002213;GO:0003677;GO:0003700;GO:0005634;GO:0006351;GO:0006355;GO:0009611;GO:0009873;GO:0051301;	AT3G49340	GO:0004197;GO:0005615;GO:0005764;GO:0006508;GO:0006508;GO:0008233;GO:0008234;GO:0008234;GO:0016787;GO:0051603;	#			extracellular space	GO:0005615	2	0.00304414	1	0.00144092	3	0.00222058	122	0.000844893	0.0637971	1.1952	AT4G11320;AT1G25425	AT3G49340	#
AT5G59520	GO:0005886;GO:0006829;GO:0016020;GO:0016020;GO:0016021;GO:0030001;GO:0030001;GO:0046873;GO:0046873;GO:0055085;GO:0055085;	AT5G13320	GO:0009626;GO:0010112;GO:0016874;GO:0034052;GO:0044419;	#			Golgi apparatus	GO:0005794	0	0	1	0.00144092	1	0.000740192	892	0.00617741	0.998893	0.000480813	-	AT3G25040	#
AT4G11320	GO:0004197;GO:0005615;GO:0005764;GO:0006508;GO:0008234;GO:0051603;	AT4G15700	GO:0005634;GO:0005737;GO:0009055;GO:0015035;GO:0045454;GO:0046872;GO:0051537;	#			intracellular	GO:0005622	44	0.0669711	49	0.0706052	93	0.0688379	11815	0.081823	0.277555	0.556651	AT3G09260;AT5G15640;AT4G36770;AT3G05690;AT4G35900;AT2G22890;AT3G01420;AT2G16650;AT4G34970;AT4G32650;AT1G74930;AT5G23020;AT2G15480;ATMG00560;AT4G25470;AT1G52410;AT1G52890;AT5G44610;AT3G16360;AT3G16450;AT4G26150;AT2G01520;ATCG00540;AT3G04570;AT5G21960;AT1G52040;AT5G27220;AT2G36400;AT1G75240;AT4G06746;ATCG00360;AT5G07010;AT2G42870;AT5G58860;AT2G44750;AT3G18010;AT1G16400;AT4G34410;AT2G21650;AT5G17330…	AT5G67450;AT3G25040;AT4G21840;AT5G18270;AT4G21850;AT1G45145;AT4G13200;AT3G26830;AT5G03350;AT4G15670;AT5G22570;AT5G38710;AT5G64530;AT1G09450;AT5G04770;AT3G49340;AT4G15680;AT3G14940;AT1G02450;AT4G33790;AT1G70920;AT3G48850;AT4G15690;AT4G23700;AT3G10340;AT3G13100;AT3G21550;AT3G09940;AT1G28480;AT3G10600;AT4G15660;AT1G09080;AT3G46090;AT3G53650;AT2G35450;AT4G08250;AT1G06830;AT4G11890;AT5G64810;AT4G15700…	#
ATMG00560	GO:0003735;GO:0003735;GO:0005622;GO:0005622;GO:0005739;GO:0005739;GO:0005840;GO:0005840;GO:0006412;GO:0006412;	AT4G13890	GO:0003824;GO:0004372;GO:0005737;GO:0006544;GO:0006563;GO:0009555;GO:0010197;GO:0030170;GO:0035999;	#			membrane	GO:0016020	24	0.0365297	33	0.0475504	57	0.042191	6904	0.0478126	0.214026	0.669534	AT2G22890;AT5G59520;AT3G09260;AT5G15640;AT2G28120;AT3G24300;AT2G18480;AT5G17820;AT1G52410;AT5G09220;ATCG00360;AT4G32650;AT3G28740;AT5G43350;AT1G16400;AT4G34250;AT5G64100;AT5G44610;AT5G58860;AT5G04960;AT4G12470;AT2G36100;ATCG00540;AT2G15090	AT4G00700;AT4G28250;AT4G13200;AT1G45145;AT3G26830;AT4G04510;AT2G30770;AT3G25040;AT4G28700;AT4G33790;AT3G48850;AT5G56320;AT1G35230;AT1G02190;AT1G25530;AT5G04770;AT4G23140;AT4G23150;AT2G20750;AT1G09080;AT3G21550;AT4G18250;AT3G10600;AT4G23700;AT3G13100;AT1G08050;AT4G04500;AT1G56120;AT4G03330;AT3G60540;AT5G53870;AT4G11890;AT1G21240	#
AT2G33830	-	AT4G24265	GO:0008150;	#			mitochondrion	GO:0005739	3	0.00456621	2	0.00288184	5	0.00370096	1328	0.00919687	0.972611	0.0120607	AT3G30775;AT5G15640;ATMG00560	AT3G48850;AT5G38710	#
ATCG00360	GO:0005515;GO:0009535;GO:0015979;	AT1G70920	GO:0003677;GO:0003677;GO:0003700;GO:0003700;GO:0005634;GO:0005634;GO:0006351;GO:0006351;GO:0006355;GO:0006355;GO:0043565;GO:0043565;GO:0044212;	#			nuclear envelope	GO:0005635	1	0.00152207	0	0	1	0.000740192	92	0.000637132	0.499254	0.301678	AT1G52410	-	#
AT5G64100	GO:0004601;GO:0004601;GO:0005576;GO:0005618;GO:0005886;GO:0006979;GO:0006979;GO:0009506;GO:0016491;GO:0020037;GO:0020037;GO:0042744;GO:0046872;GO:0046872;GO:0055114;GO:0055114;	AT3G01830	GO:0005509;	#			nucleolus	GO:0005730	0	0	0	0	0	0	458	0.00317181	1	0	-	-	#
AT3G18010	GO:0003677;GO:0003700;GO:0005634;GO:0005829;GO:0006351;GO:0048513;	AT1G45145	GO:0000103;GO:0005829;GO:0005886;GO:0006457;GO:0006662;GO:0006979;GO:0009506;GO:0010188;GO:0015035;GO:0016671;GO:0034599;GO:0045454;GO:0046686;GO:0048046;GO:0050832;GO:0055114;	#			nucleoplasm	GO:0005654	0	0	1	0.00144092	1	0.000740192	332	0.00229922	0.918491	0.0369251	-	AT1G09080	#
AT1G16400	GO:0005506;GO:0005783;GO:0005789;GO:0009684;GO:0016020;GO:0016021;GO:0016705;GO:0016709;GO:0019761;GO:0020037;GO:0055114;GO:0098542;	AT1G08050	GO:0000165;GO:0005515;GO:0005886;GO:0005886;GO:0006499;GO:0006612;GO:0007154;GO:0008270;GO:0008270;GO:0009409;GO:0009627;GO:0009690;GO:0009697;GO:0009738;GO:0009862;GO:0009867;GO:0010363;GO:0030968;GO:0031348;GO:0043069;GO:0046872;GO:0050832;	#			nucleus	GO:0005634	21	0.0319635	22	0.0317003	43	0.0318283	4474	0.030984	0.0464052	1.33343	AT1G52410;AT4G25470;AT1G52890;AT1G74930;AT4G06746;AT4G35900;AT3G05690;AT2G16650;AT1G75240;AT5G21960;AT3G09260;AT1G52040;AT2G36400;AT3G04570;AT2G21650;AT4G26150;AT3G16360;AT3G16450;AT3G18010;AT4G34410;AT2G42870	AT4G08250;AT3G53650;AT1G09080;AT3G46090;AT4G15660;AT1G28480;AT5G18270;AT4G15690;AT5G67450;AT1G70920;AT5G48850;AT4G18960;AT2G24490;AT1G02450;AT4G15680;AT3G25882;AT1G09450;AT5G64530;AT4G15700;AT4G15670;AT5G64810;AT5G22570	#
AT3G16360	GO:0000160;GO:0000160;GO:0004871;GO:0004871;GO:0000160;GO:0004871;GO:0005634;GO:0005737;GO:0005829;GO:0009736;	AT4G38560	GO:0003674;GO:0008150;GO:0009627;GO:0009697;	#			peroxisome	GO:0005777	2	0.00304414	0	0	2	0.00148038	224	0.00155128	0.500587	0.30052	AT1G52410;AT3G09260	-	#
AT3G28550	GO:0005199;GO:0005199;GO:0009664;GO:0009664;	AT2G01610	GO:0004857;GO:0004857;GO:0030599;GO:0030599;GO:0043086;	#			plastid	GO:0009536	5	0.00761035	6	0.00864553	11	0.00814212	2435	0.0168632	0.977841	0.00973176	AT5G23020;AT2G22890;AT1G52410;ATCG00360;ATCG00540	AT4G13200;AT5G03350;AT5G04770;AT2G35450;AT1G53520;AT3G10600	#
AT1G27020	GO:0008150;	AT2G03505	GO:0008150;	#			proteinaceous extracellular matrix	GO:0005578	0	0	0	0	0	0	18	0.000124656	1	0	-	-	#
AT2G36400	GO:0005524;GO:0005634;GO:0006351;GO:0006355;GO:0009624;GO:0016818;GO:0044212;GO:0048364;GO:0061062;	AT1G13650	GO:0008150;GO:0019288;GO:0008150;GO:0019288;	#			ribosome	GO:0005840	1	0.00152207	0	0	1	0.000740192	508	0.00351808	0.978691	0.00935449	ATMG00560	-	#
AT4G32650	GO:0005216;GO:0005249;GO:0005783;GO:0005886;GO:0005887;GO:0006811;GO:0006813;GO:0009624;GO:0010163;GO:0016020;GO:0042391;GO:0055085;GO:0005216;GO:0005216;GO:0005249;GO:0005249;GO:0006810;GO:0006811;GO:0006811;GO:0006813;GO:0006813;GO:0016020;GO:0016020;GO:0016021;GO:0016021;GO:0055085;GO:0055085;GO:0005216;GO:0005216;GO:0005249;GO:0005249;GO:0006810;GO:0006811;GO:0006811;GO:0006813;GO:0006813;GO:…	AT3G53650	GO:0000786;GO:0000788;GO:0003677;GO:0006334;GO:0046982;	#			thylakoid	GO:0009579	3	0.00456621	1	0.00144092	4	0.00296077	546	0.00378124	0.585363	0.232574	AT1G52410;ATCG00540;ATCG00360	AT4G13200	#
AT2G42870	GO:0003712;GO:0003712;GO:0005634;GO:0005634;GO:0006351;GO:0009641;GO:0009641;GO:0009742;GO:0032502;GO:0032502;GO:0040008;GO:0042803;GO:0045892;GO:0045892;	AT5G57010	GO:0008150;	#			vacuole	GO:0005773	9	0.0136986	10	0.0144092	19	0.0140637	2543	0.0176112	0.536745	0.270232	AT1G16400;AT5G58860;AT1G52040;AT3G09260;AT4G11320;AT4G12470;AT1G52410;AT2G15090;AT4G32650	AT4G23700;AT3G25040;AT3G13100;AT3G21550;AT4G03330;AT3G60540;AT3G49340;AT3G26830;AT1G09080;AT4G33790	#
AT4G12470	GO:0005576;GO:0005618;GO:0005783;GO:0006612;GO:0006865;GO:0009409;GO:0009506;GO:0009506;GO:0009626;GO:0009627;GO:0009627;GO:0009631;GO:0009682;GO:0009697;GO:0009814;GO:0009863;GO:0010167;GO:0010363;GO:0015706;GO:0019684;GO:0042742;GO:0043069;GO:0043621;GO:0050832;GO:0050832;GO:0070417;	AT1G21310	GO:0005199;GO:0005576;GO:0009530;GO:0009664;	#		Molecular Function	molecular_function	GO:0003674	7	0.0106545	16	0.0230548	23	0.0170244	2290	0.0158591	0.0903923	1.04387	AT3G28740;AT5G57625;AT5G58860;AT5G27220;AT1G55170;AT4G33720;ATCG00540	AT2G30750;AT4G38560;AT3G26830;AT3G15518;AT4G15660;AT1G06830;AT5G13890;AT4G00700;AT4G15690;AT1G28480;AT4G15680;AT4G15700;AT4G15670;AT5G54970;AT5G53870;AT5G20820	#
ATCG00540	GO:0005506;GO:0009055;GO:0009535;GO:0015979;GO:0020037;GO:0031361;GO:0055114;	AT5G64530	GO:0003677;GO:0003677;GO:0003700;GO:0003700;GO:0005634;GO:0006351;GO:0006355;GO:0006355;GO:0010089;GO:0010089;GO:0043067;GO:0043067;GO:0048367;GO:0048367;	#			binding	GO:0005488	55	0.0837139	60	0.0864553	115	0.0851221	13418	0.0929244	0.0234097	1.6306	AT2G44750;AT4G34410;AT1G16400;AT3G18010;AT2G42870;AT1G52070;AT5G64100;AT4G30170;AT5G58860;AT1G30870;AT4G12470;AT2G36100;AT3G15620;AT5G17330;AT2G21650;AT5G44380;AT1G63350;AT2G01530;AT5G05600;AT1G75240;AT5G21960;AT1G52040;AT2G39310;AT2G36400;AT2G30210;AT5G17820;ATCG00360;AT4G06746;AT1G52000;AT3G16450;AT2G18196;AT5G44610;AT5G56840;AT3G09220;AT5G04960;AT3G04570;ATCG00540;AT4G26150;AT2G01520;AT3G05690…	AT4G34380;AT4G03330;AT1G53520;AT5G53870;AT5G64810;AT4G11890;AT4G15700;AT1G21240;AT2G24490;AT4G18960;AT4G04500;AT5G48850;AT3G15050;AT4G13890;AT2G01610;AT1G56120;AT4G18250;AT3G09940;AT4G15690;AT1G08050;AT3G13100;AT5G40460;AT3G53650;AT1G06830;AT4G08250;AT2G04450;AT4G15660;AT1G09080;AT3G46090;AT3G01830;AT2G30750;AT1G80820;AT5G64530;AT1G02190;AT1G09450;AT5G22570;AT5G19880;AT4G15670;AT4G23150;AT4G23140…	#
AT1G52040	GO:0005634;GO:0005773;GO:0006952;GO:0019762;GO:0030246;GO:0080028;	AT3G46090	GO:0003700;GO:0005634;GO:0006351;GO:0006355;GO:0010200;GO:0045926;GO:0046872;GO:0080134;	#			receptor activity	GO:0004872	1	0.00152207	7	0.0100865	8	0.00592154	615	0.00425909	0.0917749	1.03728	AT5G44610	AT1G21240;AT1G56120;AT4G23150;AT4G04510;AT4G11890;AT4G04500;AT4G18250	#
AT2G22890	GO:0005737;GO:0006631;GO:0016021;GO:0016491;GO:0016567;GO:0019787;GO:0031625;GO:0031969;GO:0061630;	AT3G10600	GO:0003333;GO:0005887;GO:0015171;GO:0015179;GO:0015297;GO:0015807;GO:0016020;GO:0031969;GO:1902475;	#			structural molecule activity	GO:0005198	6	0.00913242	1	0.00144092	7	0.00518135	495	0.00342805	0.0793165	1.10064	AT3G54580;AT3G54590;AT1G12040;ATMG00560;AT1G23720;AT3G28550	AT1G21310	#
AT3G28740	GO:0002213;GO:0002213;GO:0004497;GO:0005506;GO:0005506;GO:0009055;GO:0009407;GO:0010583;GO:0016020;GO:0016021;GO:0016491;GO:0016705;GO:0016705;GO:0016709;GO:0020037;GO:0020037;GO:0042343;GO:0044550;GO:0046872;GO:0055114;GO:0055114;	AT2G35450	GO:0003824;GO:0003824;GO:0008152;GO:0008152;GO:0009507;GO:0009507;GO:0016787;GO:0016787;	#			transcription regulator activity	GO:0030528	0	0	0	0	0	0	0	0	1	0	-	-	#
AT5G65570	GO:0005515;	AT1G17030	GO:0008150;	#
AT1G55170	GO:0003674;GO:0008150;GO:0009908;GO:0030154;	AT4G04510	GO:0001653;GO:0004672;GO:0004675;GO:0005524;GO:0005886;GO:0006468;GO:0007178;GO:0009506;GO:0009755;GO:0016021;GO:0016772;GO:0031625;GO:0046777;	#
AT4G35900	GO:0003700;GO:0003700;GO:0005634;GO:0006355;GO:0006355;GO:0043565;GO:0043565;GO:2000028;	AT3G21550	GO:0005783;GO:0005783;GO:0008150;GO:0009705;GO:0009705;	#
AT1G63350	GO:0005515;GO:0005524;GO:0006952;GO:0006952;GO:0043531;GO:0043531;	AT5G48850	GO:0005515;GO:0005634;GO:0006792;GO:0006792;GO:0010438;GO:0010438;	#
AT1G52410	GO:0005509;GO:0005509;GO:0005515;GO:0005635;GO:0005773;GO:0005773;GO:0005777;GO:0005777;GO:0005788;GO:0009535;GO:0009535;GO:0009640;GO:0009640;GO:0050832;GO:0050832;	AT1G21240	GO:0001653;GO:0004672;GO:0004675;GO:0005509;GO:0005515;GO:0005524;GO:0006468;GO:0007178;GO:0009506;GO:0009755;GO:0016021;GO:0016772;GO:0030247;GO:0031625;GO:0046777;	#
AT1G25425	GO:0005615;GO:0007275;GO:0033612;GO:0045168;GO:0048046;	AT3G13650	GO:0048046;	#
AT5G27220	GO:0003674;GO:0005829;GO:0005829;GO:0008150;	AT5G53870	GO:0005507;GO:0005886;GO:0005886;GO:0009055;GO:0009055;GO:0031225;GO:0031225;	#
AT5G21960	GO:0003677;GO:0003700;GO:0005634;GO:0006351;GO:0006355;GO:0009873;	AT5G54970	GO:0003674;GO:0008150;	#
AT5G15640	GO:0005739;GO:0005739;GO:0006810;GO:0016020;GO:0016021;GO:0016021;GO:0055085;GO:0055085;	AT4G28700	GO:0005886;GO:0008519;GO:0009506;GO:0015398;GO:0015696;GO:0016020;GO:0016021;GO:0072488;	#
AT3G26770	GO:0008152;GO:0008152;GO:0010089;GO:0016491;GO:0016491;GO:0044036;GO:0055114;	AT4G21840	GO:0005829;GO:0006979;GO:0016671;GO:0030091;GO:0033743;GO:0046872;GO:0055114;	#
AT2G28120	GO:0005886;GO:0005886;	AT5G53330	GO:0003746;GO:0003746;GO:0005515;GO:0006414;GO:0008150;	#
AT2G18480	GO:0005215;GO:0005351;GO:0005355;GO:0005887;GO:0010311;GO:0015992;GO:0016020;GO:0016021;GO:0022857;GO:0022891;GO:0035428;GO:0046323;GO:0055085;	AT1G80820	GO:0003824;GO:0006952;GO:0007623;GO:0009409;GO:0009699;GO:0016621;GO:0042754;GO:0050662;	#
AT2G44750	GO:0004788;GO:0004788;GO:0005524;GO:0005524;GO:0005829;GO:0005829;GO:0006772;GO:0006772;GO:0009229;GO:0009229;GO:0016301;GO:0016301;GO:0016310;GO:0030975;GO:0004788;GO:0004788;GO:0005524;GO:0005524;GO:0006772;GO:0006772;GO:0009229;GO:0009229;GO:0016301;GO:0016310;GO:0030975;	AT4G03330	GO:0000149;GO:0005484;GO:0005484;GO:0005515;GO:0005886;GO:0006886;GO:0006886;GO:0006887;GO:0006906;GO:0012505;GO:0016020;GO:0016020;GO:0016021;GO:0016192;GO:0016192;GO:0031201;GO:0048278;	#
AT1G52890	GO:0003677;GO:0003700;GO:0005634;GO:0006351;GO:0006355;GO:0009414;	AT3G60540	GO:0005784;GO:0006886;GO:0009627;GO:0034976;GO:0005784;GO:0006886;GO:0009627;GO:0034976;	#
AT3G01420	GO:0001561;GO:0004601;GO:0006629;GO:0006979;GO:0008219;GO:0009626;GO:0009627;GO:0009737;GO:0009751;GO:0012511;GO:0016702;GO:0020037;GO:0031408;GO:0034614;GO:0042742;GO:0046872;GO:0050832;GO:0055114;GO:0071446;GO:0071732;GO:1902609;	AT5G63540	GO:0000724;GO:0000724;GO:0007126;GO:0007126;GO:0048451;GO:0048453;GO:0000712;	#
AT3G09260	GO:0002020;GO:0004553;GO:0005507;GO:0005634;GO:0005773;GO:0005777;GO:0005783;GO:0005788;GO:0005975;GO:0006970;GO:0008422;GO:0009506;GO:0009610;GO:0009651;GO:0009735;GO:0010168;GO:0015928;GO:0016020;GO:0031348;GO:0042803;GO:0070417;GO:0080119;	AT5G40400	GO:0005515;	#
AT1G70850	GO:0006952;GO:0006952;GO:0009607;GO:0009607;GO:0006952;GO:0006952;GO:0009607;GO:0009607;GO:0006952;GO:0006952;GO:0009607;GO:0009607;	AT5G59720	GO:0005737;GO:0009408;GO:0009644;GO:0010286;GO:0042542;	#
AT2G01520	GO:0005507;GO:0005829;GO:0006952;GO:0009607;GO:0010043;GO:0010228;GO:0080184;	AT5G56320	GO:0005576;GO:0005618;GO:0009664;GO:0016020;	#
AT5G17820	GO:0004601;GO:0004601;GO:0005576;GO:0005618;GO:0006979;GO:0006979;GO:0009505;GO:0009506;GO:0016020;GO:0016491;GO:0020037;GO:0020037;GO:0042744;GO:0046872;GO:0046872;GO:0055114;GO:0055114;	AT4G08250	GO:0003700;GO:0005634;GO:0006351;GO:0006355;	#
AT3G16450	GO:0005634;GO:0005634;GO:0009409;GO:0009409;GO:0009506;GO:0009506;GO:0010043;GO:0010043;GO:0019762;GO:0030246;GO:0080028;GO:0005634;GO:0005634;GO:0009409;GO:0009409;GO:0009506;GO:0009506;GO:0010043;GO:0010043;GO:0019762;GO:0030246;GO:0080028;GO:0005634;GO:0005634;GO:0009409;GO:0009409;GO:0009506;GO:0009506;GO:0010043;GO:0010043;GO:0019762;GO:0030246;GO:0080028;	AT2G44380	GO:0010167;GO:0015706;GO:0047134;GO:0047134;GO:0055114;GO:0055114;	#
AT2G05510	GO:0008150;	AT1G02190	GO:0005506;GO:0005506;GO:0006633;GO:0006633;GO:0016020;GO:0016021;GO:0016021;GO:0016491;GO:0016491;GO:0055114;GO:0055114;GO:0005506;GO:0006633;GO:0016021;GO:0016491;GO:0055114;	#
AT5G43350	GO:0005315;GO:0005886;GO:0006817;GO:0015114;GO:0015293;GO:0016021;GO:0016036;GO:0022857;GO:0035435;GO:0055085;GO:1901683;GO:1901684;	AT4G00700	GO:0003674;GO:0005509;GO:0005515;GO:0005544;GO:0005575;GO:0005886;GO:0008150;GO:0009627;GO:0016740;GO:0016757;GO:0016757;GO:0034976;	#
AT3G54580	GO:0005199;GO:0005199;GO:0009664;GO:0009664;	AT5G59540	GO:0016491;GO:0016706;GO:0055114;GO:0016491;GO:0016706;GO:0046872;GO:0055114;	#
AT5G63600	GO:0000041;GO:0006826;GO:0009416;GO:0009416;GO:0009718;GO:0009744;GO:0009813;GO:0009813;GO:0010106;GO:0010167;GO:0010224;GO:0015706;GO:0016491;GO:0016491;GO:0016706;GO:0016706;GO:0045431;GO:0045431;GO:0046872;GO:0051555;GO:0051555;GO:0055114;GO:0055114;GO:0016491;GO:0016706;GO:0045431;GO:0046872;GO:0055114;	AT5G19880	GO:0004601;GO:0004601;GO:0005576;GO:0006979;GO:0006979;GO:0016491;GO:0020037;GO:0020037;GO:0042744;GO:0046872;GO:0046872;GO:0055114;GO:0055114;	#
AT3G09220	GO:0005507;GO:0016491;GO:0046274;GO:0048046;GO:0052716;GO:0055114;	AT1G09080	GO:0005524;GO:0005788;GO:0006351;GO:0006355;GO:0009860;GO:0016592;	#
AT5G44610	GO:0000041;GO:0000902;GO:0000902;GO:0005516;GO:0005516;GO:0005545;GO:0005545;GO:0005737;GO:0005874;GO:0005886;GO:0005886;GO:0006826;GO:0007165;GO:0007165;GO:0008017;GO:0008017;GO:0008360;GO:0009409;GO:0009409;GO:0009651;GO:0009651;GO:0009653;GO:0009737;GO:0009737;GO:0009739;GO:0009739;GO:0010038;GO:0010038;GO:0010106;GO:0010150;GO:0010150;GO:0010167;GO:0015706;GO:0031115;GO:0031115;GO:0038023;GO:…	AT3G25040	GO:0000139;GO:0005783;GO:0005789;GO:0005794;GO:0005794;GO:0006084;GO:0006621;GO:0006621;GO:0006810;GO:0010204;GO:0010204;GO:0015031;GO:0015031;GO:0016020;GO:0016021;GO:0016021;GO:0016126;GO:0016132;GO:0016192;GO:0030244;GO:0046923;GO:0046923;GO:0048193;	#
AT4G11650	GO:0009651;GO:0009816;GO:0009817;	AT4G23700	GO:0005770;GO:0006623;GO:0006812;GO:0006813;GO:0006885;GO:0015299;GO:0016021;GO:0055085;	#
AT2G39310	GO:0019762;GO:0030246;GO:0080028;GO:0019762;GO:0030246;GO:0080028;GO:0019762;GO:0080028;	AT4G04500	GO:0001653;GO:0004672;GO:0004675;GO:0005524;GO:0005886;GO:0006468;GO:0007178;GO:0009506;GO:0009755;GO:0016021;GO:0016772;GO:0031625;GO:0046777;	#
AT3G24300	GO:0005886;GO:0008519;GO:0010311;GO:0015696;GO:0016020;GO:0016021;GO:0072488;GO:0080181;	AT4G18250	GO:0001653;GO:0004672;GO:0004672;GO:0004674;GO:0004675;GO:0005524;GO:0005524;GO:0005886;GO:0006468;GO:0006468;GO:0007178;GO:0009506;GO:0009755;GO:0016301;GO:0016310;GO:0016772;GO:0016772;GO:0031625;GO:0046777;	#
AT1G23720	GO:0005199;GO:0005199;GO:0009664;GO:0009664;	AT1G01680	GO:0004842;GO:0006950;GO:0016567;GO:0016874;	#
AT5G44380	GO:0003824;GO:0003824;GO:0005618;GO:0005618;GO:0006979;GO:0006979;GO:0008762;GO:0008762;GO:0009506;GO:0009506;GO:0010167;GO:0015706;GO:0016491;GO:0016491;GO:0016614;GO:0016614;GO:0050660;GO:0050660;GO:0055114;GO:0055114;	AT3G25882	GO:0005634;	#
AT4G15390	GO:0000041;GO:0016740;GO:0016747;GO:0016747;	AT3G14170	GO:0008150;	#
AT5G57625	GO:0003674;GO:0005576;GO:0005576;GO:0008150;	AT5G13890	GO:0003674;GO:0008150;GO:0003674;GO:0008150;GO:0003674;GO:0008150;	#
AT5G58860	GO:0004497;GO:0005506;GO:0005506;GO:0005773;GO:0006631;GO:0009055;GO:0010345;GO:0016021;GO:0016491;GO:0016705;GO:0016705;GO:0018685;GO:0020037;GO:0020037;GO:0046872;GO:0055114;GO:0055114;GO:0070330;	AT1G35230	GO:0005886;GO:0031225;	#
AT2G30210	GO:0005507;GO:0016491;GO:0046274;GO:0048046;GO:0052716;GO:0055114;	AT5G40460	GO:0005515;GO:0005575;GO:0008150;GO:0009694;GO:0009753;	#
AT5G63560	GO:0016740;GO:0016746;GO:0016747;GO:0016747;GO:0090430;GO:0090430;GO:0090431;GO:0090431;	AT1G16420	GO:0004197;GO:0006508;GO:0006979;GO:0010225;GO:0010421;GO:0012501;GO:0042542;	#
AT4G25820	GO:0004553;GO:0005618;GO:0005975;GO:0006073;GO:0016762;GO:0048046;GO:0071555;	AT3G15050	GO:0005515;GO:0008150;GO:0010413;GO:0045492;	#
AT2G23540	GO:0005576;GO:0016042;GO:0016788;	AT5G67450	GO:0003676;GO:0003676;GO:0003677;GO:0003700;GO:0005634;GO:0006351;GO:0009409;GO:0009738;GO:0010200;GO:0042538;GO:0043565;GO:0045892;GO:0046872;GO:0046872;	#
AT1G52070	GO:0019762;GO:0030246;GO:0080028;	AT2G46580	GO:0004733;GO:0008615;GO:0009443;GO:0010181;GO:0016491;GO:0055114;	#
AT4G33720	GO:0003674;GO:0005576;GO:0005576;GO:0008150;	AT4G05430	GO:0008150;	#
AT3G04570	GO:0000041;GO:0003677;GO:0003677;GO:0005634;GO:0006351;GO:0006355;GO:0010359;GO:0045087;GO:0045824;GO:0050832;GO:0050832;	AT1G09450	GO:0004672;GO:0004672;GO:0005524;GO:0005524;GO:0005634;GO:0005634;GO:0005737;GO:0005737;GO:0006260;GO:0006270;GO:0006275;GO:0006306;GO:0006468;GO:0006468;GO:0007067;GO:0007067;GO:0008283;GO:0009909;GO:0010389;GO:0016301;GO:0016310;GO:0016458;GO:0016570;GO:0016772;GO:0016772;GO:0031047;GO:0034968;GO:0035402;GO:0035402;GO:0035407;GO:0035407;GO:0035556;GO:0048449;GO:0048451;GO:0048453;GO:0051225;GO:…	#
AT1G30870	GO:0004601;GO:0005576;GO:0006979;GO:0020037;GO:0042744;GO:0046872;GO:0055114;	AT5G20820	GO:0003674;	#
AT4G34410	GO:0001944;GO:0003677;GO:0003700;GO:0005634;GO:0006351;GO:0006355;GO:0009873;GO:0010200;GO:0050832;GO:0051301;	AT4G18960	GO:0003700;GO:0003700;GO:0005634;GO:0005634;GO:0006355;GO:0006355;GO:0003677;GO:0003700;GO:0003700;GO:0005634;GO:0005634;GO:0006355;GO:0006355;GO:0046983;GO:0048438;	#
AT5G04960	GO:0004857;GO:0005618;GO:0016021;GO:0030599;GO:0042545;GO:0045330;GO:0045490;	AT3G58350	GO:0005515;GO:0009615;GO:0009615;GO:0010413;GO:0043621;GO:0045492;GO:0046741;GO:0051607;	#
AT1G12040	GO:0000904;GO:0005199;GO:0005515;GO:0005576;GO:0009505;GO:0009506;GO:0009826;GO:0010054;GO:0071555;	AT5G64810	GO:0003700;GO:0003700;GO:0005634;GO:0006351;GO:0006355;GO:0006355;GO:0009867;GO:0042742;GO:0043565;GO:0043565;GO:0050832;	#
		AT4G13200	GO:0009507;GO:0009535;GO:0009579;GO:0010287;	#
		AT4G35060	GO:0009506;GO:0009506;GO:0030001;GO:0030001;GO:0046872;GO:0046872;	#
		AT2G24490	GO:0003676;GO:0003677;GO:0005634;GO:0006260;GO:0006281;GO:0006310;GO:0016458;GO:0003676;GO:0003677;GO:0005634;GO:0006260;GO:0006281;GO:0006310;GO:0016458;	#
		AT5G18270	GO:0003677;GO:0003677;GO:0003700;GO:0003700;GO:0005634;GO:0005634;GO:0005737;GO:0005737;GO:0006351;GO:0006355;GO:0006355;GO:0003677;GO:0003677;GO:0005634;GO:0006351;GO:0006355;GO:0006355;	#
		AT1G53520	GO:0005504;GO:0006631;GO:0009507;GO:0009570;GO:0009813;GO:0016872;GO:0045430;	#
		AT2G30750	GO:0005506;GO:0005506;GO:0009055;GO:0016705;GO:0016705;GO:0020037;GO:0020037;GO:0055114;GO:0055114;	#
		AT4G34380	GO:0005515;GO:0008150;	#
		AT1G19250	GO:0004499;GO:0009626;GO:0009627;GO:0009870;GO:0010204;GO:0016491;GO:0042742;GO:0050660;GO:0050661;GO:0050832;GO:0051707;GO:0055114;GO:0071456;	#
		AT3G48850	GO:0005743;GO:0006810;GO:0009651;GO:0016021;	#
